# Supplementary material for: A 3D Attitude Estimation Method Based on Attitude Angular Partial Feedback for Polarization-Based Integrated Navigation System
Source: MDPI journal article supplement (doi:10.3390/s22030710), 2022-01-18
Supplement: s1 [file s1]

## Supplementary file

**Table S1.** Simulation assumptions for evaluating pitch estimation

| Nominal $\gamma_x / ^\circ$ | Time interval | Date and Location | Initial yaw $/^\circ$ | Real $\gamma_x$<br>Min~Max (Mean) $/^\circ$ |
|-----------------------------|---------------|-------------------|-----------------------|---------------------------------------------|
| 0                           |               |                   | 203.87                | 0~4.87(2.29)                                |
| 15                          |               |                   | 218.87                | 14.03~17.43 (15.35)                         |
| 30                          |               |                   | 233.87                | 28.65~32.14 (30.24)                         |
| 45                          | 18:12:00-     | 1/6/2020          | 248.87                | 43.52~47.02 (45.20)                         |
| 60                          | 18:53:00      | 20°N              | 263.87                | 58.44~61.95 (60.18)                         |
| 75                          |               | 120°E             | 278.87                | 73.39~76.90 (75.16)                         |
| 90                          |               |                   | 293.87                | 88.15~90.00 (89.11)                         |

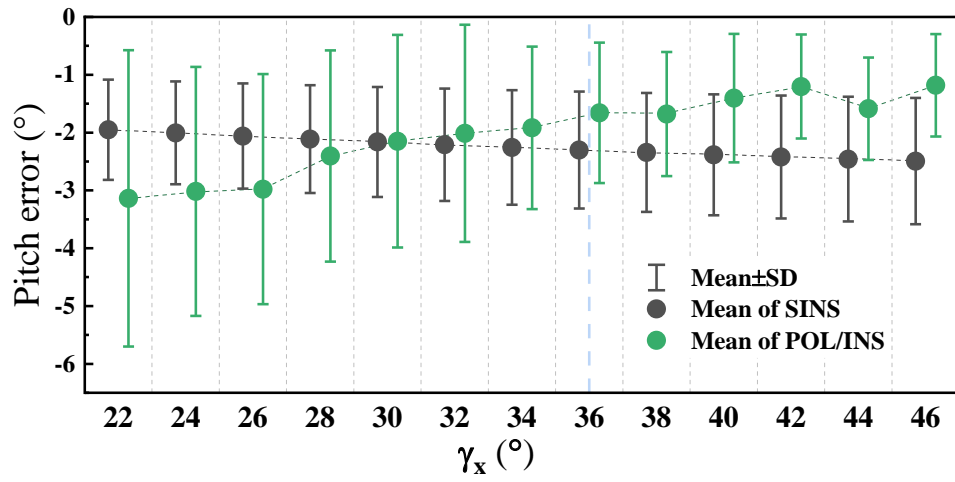

**Figure S1.** The pitch estimation error of INS/POL for different  $\gamma_x$  in the range from  $22^\circ$  to  $46^\circ$

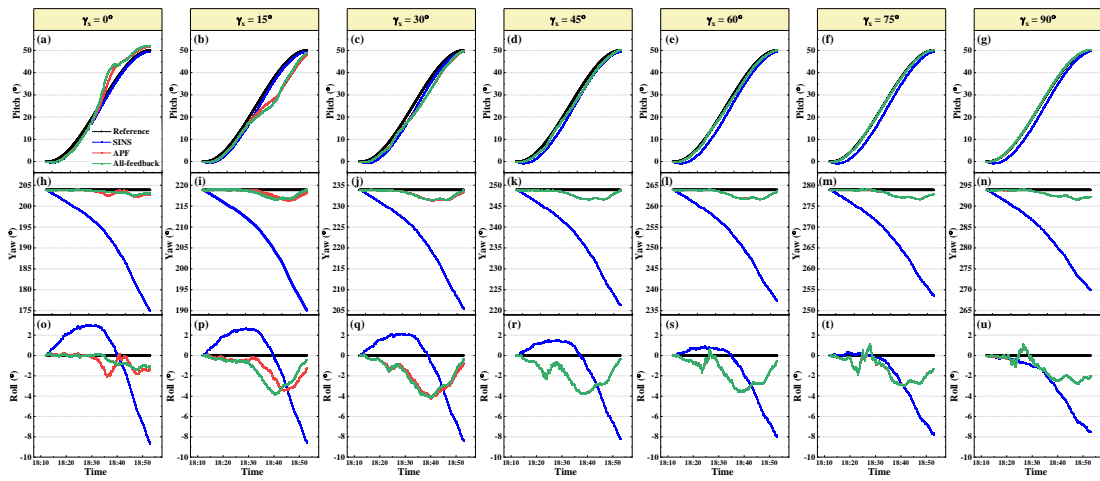

**Figure S2.** 3D attitude angles estimation curves for different  $\gamma_x$ .

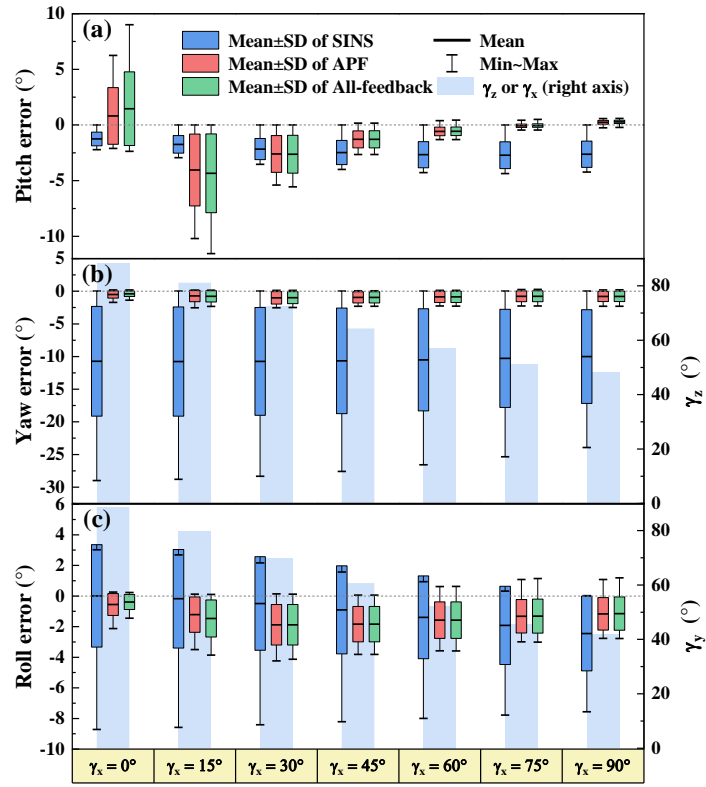

Figure S3. 3D attitude errors for different  $\gamma_x$ .

Table S2. Simulation assumptions for evaluating roll estimation

| Nominal $\gamma_y / ^\circ$ | Time interval         | Date and Location         | Initial yaw $/^\circ$ | Real $\gamma_y$<br>Min~Max (Mean) $/^\circ$ |
|-----------------------------|-----------------------|---------------------------|-----------------------|---------------------------------------------|
| 0                           | 18:12:00-<br>18:53:00 | 1/6/2020<br>20°N<br>120°E | 293.87                | 0~4.87(2.29)                                |
| 15                          |                       |                           | 278.87                | 13.88~17.21 (15.06)                         |
| 30                          |                       |                           | 263.87                | 28.47~31.94 (29.95)                         |
| 45                          |                       |                           | 248.87                | 43.33~46.82 (44.91)                         |
| 60                          |                       |                           | 233.87                | 58.25~61.75 (59.88)                         |
| 75                          |                       |                           | 218.87                | 73.19~76.70 (74.87)                         |
| 90                          |                       |                           | 203.87                | 88.15~90.00 (89.11)                         |

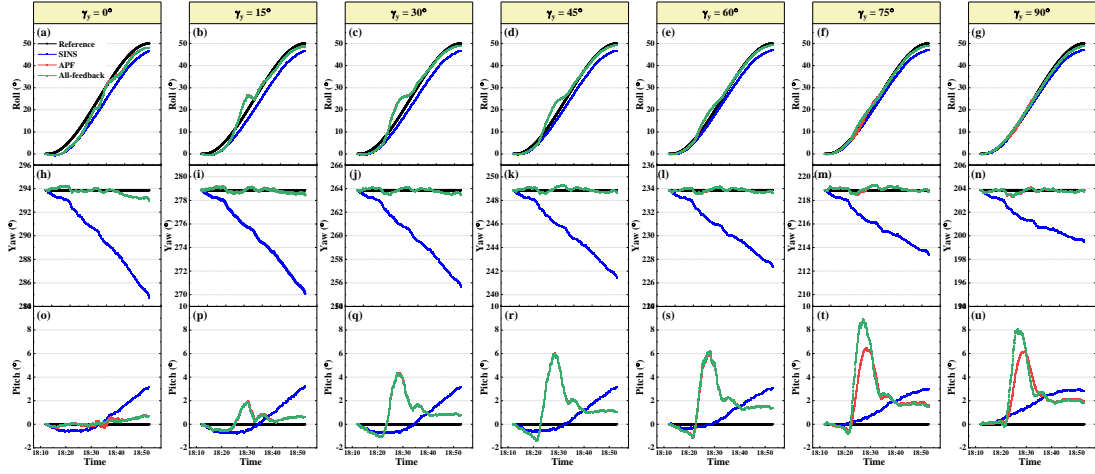

Figure S4. 3D attitude angle estimation curves for different  $\gamma_y$ .

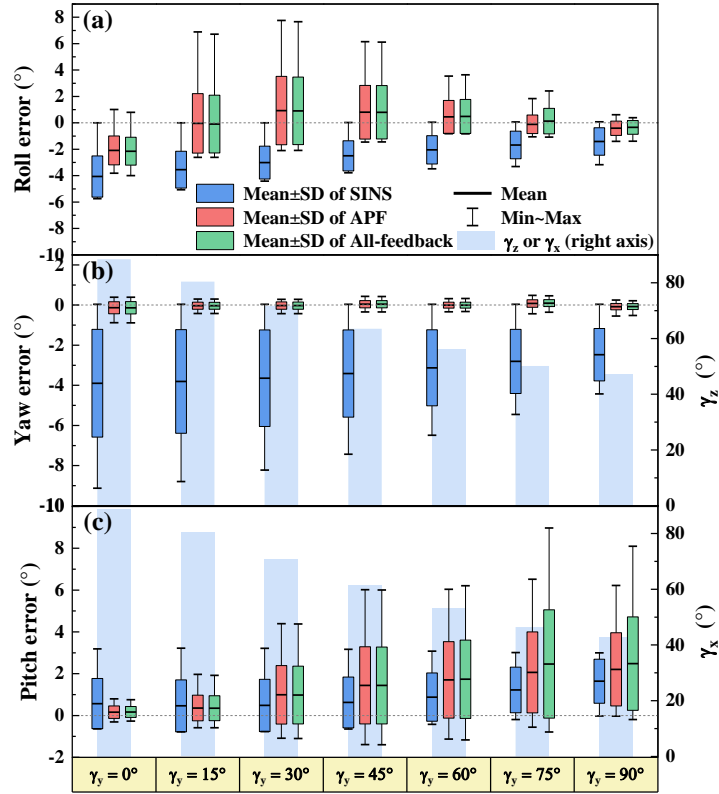

Figure S5. 3D attitude errors for different  $\gamma_y$ .

State-transition matrix  $\Phi$ :

$$\Phi = \begin{bmatrix} \Phi_N & \Phi_S \\ \mathbf{0}_{6 \times 9} & \mathbf{0}_{6 \times 6} \end{bmatrix}_{15 \times 15}$$

The nonzero elements in  $\Phi_N$  are expressed as follows:

$$\begin{aligned}
\Phi_N(1,2) &= \omega_{ie} \sin L + \frac{v_E}{R_N + h} \tan L, \quad \Phi_N(1,3) = -\left( \omega_{ie} \cos L + \frac{v_E}{R_N + h} \right), \quad \Phi_N(1,5) = -\frac{1}{R_M + h}, \\
\Phi_N(1,9) &= \frac{v_N}{(R_M + h)^2}, \quad \Phi_N(2,1) = -(\omega_{ie} \sin L + \frac{v_E}{R_N + h} \tan L), \quad \Phi_N(2,3) = -\frac{v_N}{R_M + h}, \\
\Phi_N(2,4) &= \frac{1}{R_N + h}, \quad \Phi_N(2,7) = -\omega_{ie} \sin L, \quad \Phi_N(2,9) = -\frac{v_E}{(R_N + h)^2}, \quad \Phi_N(3,1) = \omega_{ie} \cos L + \frac{v_E}{R_N + h}, \\
\Phi_N(3,2) &= \frac{v_N}{R_M + h}, \quad \Phi_N(3,4) = \frac{1}{R_N + h} \tan L, \quad \Phi_N(3,7) = \omega_{ie} \cos L + \frac{v_E}{R_N + h} \sec^2 L, \quad \Phi_N(4,2) = -f_U, \\
\Phi_N(3,9) &= -\frac{v_E}{(R_N + h)^2} \tan L, \quad \Phi_N(4,3) = f_N, \quad \Phi_N(4,4) = \frac{v_N}{R_M + h} \tan L - \frac{v_U}{R_M + h}, \\
\Phi_N(4,5) &= 2\omega_{ie} \sin L + \frac{v_E}{R_N + h} \tan L, \quad \Phi_N(4,6) = -2\omega_{ie} \cos L - \frac{v_E}{R_N + h}, \\
\Phi_N(4,7) &= 2\omega_{ie} v_N \cos L + \frac{v_E v_N}{R_N + h} \sec^2 L + 2\omega_{ie} v_U \sin L, \quad \Phi_N(4,9) = \frac{v_E v_U - v_E v_N \tan L}{(R_N + h)^2}, \quad \Phi_N(5,1) = f_U, \\
\Phi_N(5,3) &= -f_E, \quad \Phi_N(5,5) = -\frac{v_U}{R_M + h}, \quad \Phi_N(5,4) = -(2\omega_{ie} \sin L + \frac{v_E}{R_N + h} \tan L), \quad \Phi_N(5,6) = -\frac{v_N}{R_M + h}, \\
\Phi_N(5,7) &= -(2\omega_{ie} v_E \cos L + \frac{v_E^2}{R_N + h} \sec^2 L) v_E, \quad \Phi_N(5,9) = \frac{v_N v_U + v_E^2 \tan L}{(R_N + h)^2}, \quad \Phi_N(6,1) = -f_N, \\
\Phi_N(6,2) &= -f_E, \quad \Phi_N(6,4) = 2(\omega_{ie} \cos L + \frac{v_E}{R_N + h}), \quad \Phi_N(6,5) = \frac{2v_N}{R_M + h}, \quad \Phi_N(6,7) = -2\omega_{ie} v_E \sin L, \\
\Phi_N(6,9) &= -\frac{v_E^2 + v_N^2}{(R_N + h)^2}, \quad \Phi_N(7,5) = \frac{1}{R_M + h}, \quad \Phi_N(7,9) = -\frac{v_N}{(R_M + h)^2}, \quad \Phi_N(8,4) = \frac{\sec L}{R_N + h}, \\
\Phi_N(8,7) &= \frac{v_E}{R_N + h} \sec L \tan L, \quad \Phi_N(8,9) = -\frac{v_E}{(R_N + h)^2} \sec L, \quad \Phi_N(9,6) = 1
\end{aligned}$$

where,  $R_M$  is the radius of curvature of meridian,  $R_N$  is the radius of curvature in prime vertical,  $\omega_{ie}$  is the earth's rotation angular velocity,  $L$  is the local longitude,  $h$  is the height of vehicle,  $v_E, v_N, v_U$  are 3D velocities and  $f_E, f_N, f_U$  are the outputs of tri-axis accelerometer.

$\Phi_S$  is expressed as

$$\Phi_S = \begin{bmatrix} C_b^n & 0_{3 \times 3} \\ 0_{3 \times 3} & C_b^n \\ 0_{3 \times 3} & 0_{3 \times 3} \end{bmatrix}_{9 \times 6}$$
